# Supplementary material for: Microbial Decontamination of Bee Pollen by Direct Ozone Exposure
Source: MDPI journal article supplement (doi:10.3390/foods10112593), 2021-10-27
Supplement: s1 [file s1]

## Quantification

An Agilent system with a Model 1200 chromatograph and a Model 6410 triple quadrupole analyser (Agilent Technologies, Palo Alto, CA, USA) were employed. LC analysis was performed with a Kinetex 2.6 $\mu$ m biphenyl column of 100 x 3 mm i.d. and, 100Å particle size (Phenomenex, Torrance, CA, USA). The mobile phase A was 0.1% formic acid in water and the mobile phase B was MeOH following the gradient indicated in Table S1. The column was maintained at 25°C, flow rate varied between 0.2 and 0.35 mL min<sup>-1</sup> and the injection volume was 10  $\mu$ L. The system used an electrospray ion source (ESI) operating in negative mode in the following conditions: drying gas temperature (325°C), drying gas flow (9 Lmin<sup>-1</sup>), pressure of the nebulizer (35 psi) and capillary voltage (-4000 V). Nitrogen gas was used in the nebulizer and in the collision cell. Identification of each polyphenol was based on the detection of two selected reaction monitoring (SRMs transitions) one quantifier transition (SRM1) and one qualifier transition (SRM2) by flow injection analysis of each standard analyte (Table S2).

Table S1. Gradient of mobile phase.

| Time(min) | MeOH | 0.1% Formic acid | Flow(mL.min <sup>-1</sup> ) |
|-----------|------|------------------|-----------------------------|
| 0         | 5    | 95               | 0.35                        |
| 6         | 50   | 50               | 0.35                        |
| 9.5       | 55   | 45               | 0.35                        |
| 10.5      | 55   | 45               | 0.20                        |
| 12.0      | 57   | 43               | 0.20                        |
| 15.0      | 67.5 | 32.5             | 0.20                        |
| 17.0      | 75.0 | 25               | 0.3                         |
| 22        | 90   | 10               | 0.3                         |
| 25        | 5    | 95               | 0.35                        |
| 35        | 5    | 95               | 0.35                        |

Table S2. Characterization of the phenolic compounds by LC-MS/MS.

| Time segment | Compound        | Precursor | SRM1<br>SMR2 | Fragmentor<br>(V) | Collision<br>Energy<br>(V) | Dwell      |
|--------------|-----------------|-----------|--------------|-------------------|----------------------------|------------|
| 1            | Gallic acid     | 169       | 125<br>79    | 80<br>80          | 10<br>20                   | 500<br>400 |
| 2            | Rutin           | 609       | 301<br>271   | 180<br>180        | 10<br>25                   | 120<br>120 |
| 2            | Caffeic acid    | 179       | 135<br>89    | 80<br>80          | 10<br>25                   | 140<br>140 |
| 2            | p-Coumaric acid | 163       | 119<br>93    | 80<br>80          | 15<br>30                   | 120<br>120 |
| 3            | Quercetin       | 301       | 151<br>179   | 140<br>140        | 13<br>10                   | 55<br>50   |

|   |             |     |            |            |          |          |
|---|-------------|-----|------------|------------|----------|----------|
| 3 | Kaempferol  | 285 | 117<br>211 | 160<br>160 | 55<br>30 | 55<br>50 |
| 3 | Luteolin    | 285 | 133<br>175 | 100<br>100 | 30<br>17 | 55<br>50 |
| 3 | Naringenin  | 271 | 119<br>107 | 100<br>100 | 30<br>25 | 50<br>55 |
| 3 | Genistein   | 269 | 133<br>63  | 100<br>100 | 33<br>40 | 55<br>50 |
| 3 | Chrysin     | 253 | 143<br>107 | 90<br>90   | 30<br>25 | 55<br>50 |
| 3 | Resveratrol | 227 | 143<br>185 | 110<br>110 | 25<br>13 | 55<br>50 |

Table S3. Recoveries (%), precision (RSD%) and quantitation limit (LOQ) .Recoveries are the mean of three independent determinations at 30 and 500 ng/ml, equivalent to 1.8 and 31.2 µg/g.

|             | Recovery (average (R) and RSD |       |          |       | LOQ (µg/g) |
|-------------|-------------------------------|-------|----------|-------|------------|
|             | 30ng/ml                       |       | 500ng/ml |       |            |
|             | % R                           | % RSD | % R      | % RSD |            |
| Caffeic     | 71.2                          | 12    | 75.8     | 10    | 0.14       |
| Galic       | 89.5                          | 9     | 100.7    | 6     | 0.6        |
| p-Coumaric  | 80.7                          | 8     | 89.8     | 1     | 0.17       |
| Chrysin     | 83.05                         | 4     | 89.5     | 4     | 0.36       |
| Kaempherol  | 96.5                          | 20    | 80.7     | 16    | 0.37       |
| Luteolin    | 103.3                         | 5     | 98.75    | 1     | 0.66       |
| Naringerin  | 97.3                          | 8     | 84.2     | 5     | 0.71       |
| Quercetin   | 101.9                         | 11    | 90.85    | 6     | 0.67       |
| Rutin       | 111.6                         | 10    | 103      | 1     | 0.38       |
| Resveratrol | 74.25                         | 15    | 90.05    | 14    | 0.5        |
| Genistein   | 88.1                          | 16    | 100.4    | 13    | 0.2        |
